# Supplementary material for: Maternal Protein Restriction Differentially Alters the Expression of AQP1, AQP9 and VEGFr-2 in the Epididymis of Rat Offspring
Source: MDPI journal article supplement (doi:10.3390/ijms20030469), 2019-01-22
Supplement: s1 [file s1]

**Table 2.** Body weight of male and female offspring at birth.

| Parameters      | Male        |               | Female      |               |
|-----------------|-------------|---------------|-------------|---------------|
|                 | NP          | LP            | NP          | LP            |
| Number of pups  | 5.29 ± 0.43 | 5.47 ± 0.52   | 5.71 ± 0.62 | 5.58 ± 0.51   |
| Body weight (g) | 6.33 ± 0.12 | 5.79 ± 0.10 * | 5.87 ± 0.09 | 5.79 ± 0.10 * |

NP,  $N = 17$  litters/group. LP,  $N = 19$  litters/group. Data are expressed as the mean ± S.E.M., \*  $p < 0.05$  vs. NP. Test  $t$  and Mann-Whitney for parametric and non-parametric data, respectively.
